# Supplementary material for: Electrochemically detecting DNA methylation in theEN1gene promoter: implications for understanding ageing and disease
Source: Oxford University Press journal article supplement (doi:10.1042/bsr20202571), 2020-11-01
Supplement: bsr-2020-2571_supp.pdf [file bsr-2020-2571_supp.pdf]

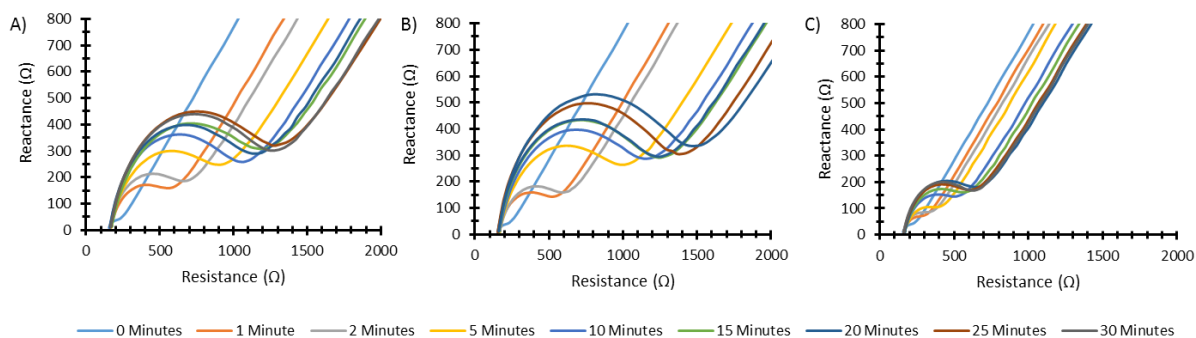

**Figure S1 Effect of DNA adsorption time on Nyquist plots.**

Nyquist plots for a 2mm Au-RDE in 2.5mM ferrocyanide/2.5mM ferricyanide/1X PBS after rotation assisted adsorption at 2000rpm for a range of times in A) 50nM methylated DNA, B) 50nM unmethylated DNA, C) 1X PBS. Mean shown (n=3, PBS n=1).

**Table S1 Effect of DNA adsorption time on  $R_{ct}$ .**

$R_{ct}$  (determined from Z-fit analysis of Nyquist plots) for a 2mm Au-RDE in 2.5mM ferrocyanide/2.5mM ferricyanide/1X PBS after rotation assisted adsorption at 2000rpm for a range of times in 50nM methylated and unmethylated DNA, and 1X PBS. Mean  $\pm$ SD (n=3, PBS n = 1).

\*Statistical difference between values for methylated and unmethylated DNA, when tested for using

| Time<br>(Mins) | R <sub>ct</sub> (Ω) |      |         |            |       |         |              |       |         | PBS    |
|----------------|---------------------|------|---------|------------|-------|---------|--------------|-------|---------|--------|
|                | No Immersion        |      |         | Methylated |       |         | Unmethylated |       |         |        |
|                | Mean                | SD   | RSD (%) | Mean       | SD    | RSD (%) | Mean         | SD    | RSD (%) |        |
| 0              | 76.41               | 2.59 | 3.39    |            |       |         |              |       |         |        |
| 1              |                     |      |         | 263.17     | 12.79 | 4.86    | 323.30       | 10.67 | 3.30    | 140.70 |
| 2              |                     |      |         | 335.97     | 24.06 | 7.16    | 395.10       | 17.29 | 4.38    | 178.90 |
| 5              |                     |      |         | 707.57     | 10.62 | 1.50    | 795.23       | 11.62 | 1.46    | 228.00 |
| 10             |                     |      |         | 844.97     | 18.15 | 2.15    | 937.53       | 10.25 | 1.09    | 343.90 |
| 15             |                     |      |         | 967.27     | 82.51 | 8.53    | 1019.87      | 57.02 | 5.59    | 391.40 |
| 20             |                     |      |         | 927.57     | 31.41 | 3.39    | 1014.27      | 65.37 | 6.45    | 466.00 |
| 25             |                     |      |         | 1062.33    | 37.00 | 3.48    | 1145.33      | 25.15 | 2.20    | 436.30 |
| 30             |                     |      |         | 1039.03*   | 62.48 | 6.01    | 1233.33*     | 67.25 | 5.45    | 443.60 |

a one-way ANOVA ( $p < 0.05$ ).

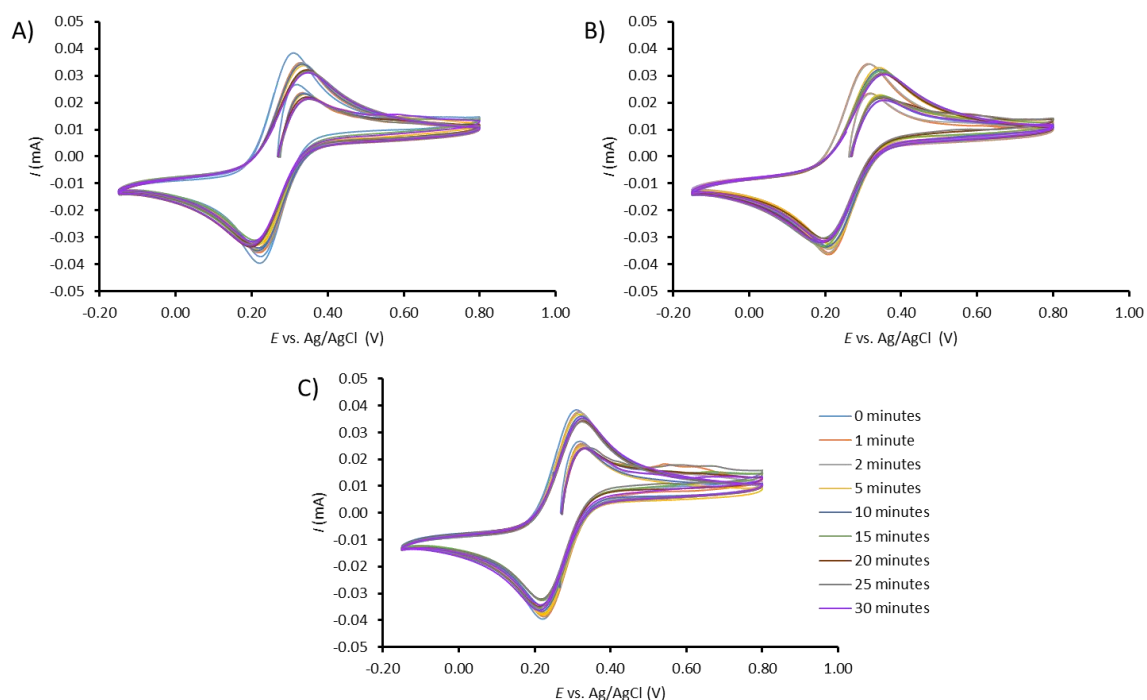

**Figure S2 Effect of DNA adsorption time on cyclic voltammograms.**

CV conducted for 2mm Au-RDE in 2.5mM ferrocyanide/2.5mM ferricyanide/1X PBS after rotation assisted adsorption at 2000rpm for a range of times in A) 50nM methylated DNA, B) 50nM unmethylated DNA and C) 1X PBS, at a scan speed of 200mV/s. Mean shown (n=3, PBS n=1).

**Table S2 Effect of DNA adsorption time on  $\Delta E_p$ .**

| Time<br>(Mins) | $\Delta E_p$ (mV) |     |         |            |     |         |              |      |         | PBS   |
|----------------|-------------------|-----|---------|------------|-----|---------|--------------|------|---------|-------|
|                | No immersion      |     |         | Methylated |     |         | Unmethylated |      |         |       |
|                | Mean              | SD  | RSD (%) | Mean       | SD  | RSD (%) | Mean         | SD   | RSD (%) |       |
| 0              | 87.9              | 0.5 | 0.57    |            |     |         |              |      |         |       |
| 1              |                   |     |         | 100.3      | 2.6 | 2.61    | 101.3        | 0.60 | 0.55    | 94.6  |
| 2              |                   |     |         | 110.7      | 1.7 | 1.51    | 110.8        | 1.60 | 1.48    | 94.9  |
| 5              |                   |     |         | 126.0*     | 2.3 | 1.83    | 135.2*       | 2.10 | 1.57    | 99.7  |
| 10             |                   |     |         | 143.8      | 2.8 | 1.97    | 143.6        | 2.00 | 1.38    | 104.9 |
| 15             |                   |     |         | 140.9*     | 1.7 | 1.18    | 155.8*       | 3.70 | 2.36    | 108.8 |
| 20             |                   |     |         | 145.8*     | 5.0 | 3.44    | 157.9*       | 0.80 | 0.49    | 112.5 |

|    |        |     |      |        |      |      |       |
|----|--------|-----|------|--------|------|------|-------|
| 25 | 155.6* | 2.9 | 1.86 | 168.4* | 2.20 | 1.29 | 111.2 |
| 30 | 148.8* | 1.7 | 1.15 | 167.9* | 1.70 | 1.04 | 111.6 |

$\Delta E_p$  (mV) for CV conducted for 2mm Au-RDE in 2.5mM ferrocyanide/2.5mM ferricyanide/1X PBS after rotation assisted adsorption at 2000rpm for a range of times in 50nM methylated DNA, 50nM unmethylated DNA and 1X PBS, at a scan speed of 200mV/s. Mean  $\pm$ SD (n=3, PBS n=1). \*Statistical difference between values for methylated and unmethylated DNA, when tested for using a one-way ANOVA ( $p<0.05$ ).

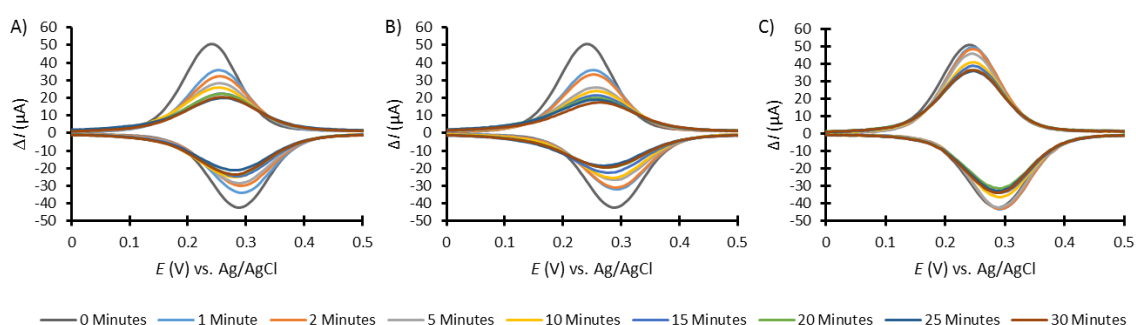

**Figure S3 Effect of DNA adsorption time on DPV.**

DPV signals for 2mm Au-RDE in 2.5mM ferrocyanide/2.5mM ferricyanide/1X PBS after rotation assisted adsorption at 2000rpm for a range of times in A) 50nM methylated DNA, B) 50nM unmethylated DNA and C) 1X PBS. Mean (n=3, PBS n=1).

**Table S3 Effect of DNA adsorption time on peak current.**

$i_{pa}$  ( $\mu$ A) obtained with 2mm Au-RDE in 2.5mM ferrocyanide/2.5mM ferricyanide/1X PBS after rotation assisted adsorption at 2000rpm for a range of times in 50nM methylated DNA, 50nM unmethylated DNA and 1X PBS. Mean  $\pm$ SD (n=3, PBS n=1). \*Statistical difference between values for methylated and unmethylated DNA, when tested for using a one-way ANOVA ( $p<0.05$ ).

| Time<br>(Mins) | $i_{pa}$ ( $\mu$ A) |      |         |            |      |         |              |      |         | PBS   |
|----------------|---------------------|------|---------|------------|------|---------|--------------|------|---------|-------|
|                | No immersion        |      |         | Methylated |      |         | Unmethylated |      |         |       |
|                | Mean                | SD   | RSD (%) | Mean       | SD   | RSD (%) | Mean         | SD   | RSD (%) |       |
| 0              | 50.82               | 1.02 | 2.01    |            |      |         |              |      |         |       |
| 1              |                     |      |         | 35.66      | 0.42 | 1.17    | 35.67        | 0.44 | 1.23    | 49.55 |
| 2              |                     |      |         | 32.18      | 0.71 | 2.22    | 33.40        | 0.38 | 1.13    | 48.15 |
| 5              |                     |      |         | 28.65*     | 0.56 | 1.95    | 26.09*       | 0.34 | 1.30    | 45.94 |
| 10             |                     |      |         | 25.66      | 0.42 | 1.65    | 23.81        | 0.12 | 0.50    | 40.91 |

|    |        |      |      |        |      |      |       |
|----|--------|------|------|--------|------|------|-------|
| 15 | 22.67  | 1.01 | 4.45 | 21.65  | 0.29 | 1.33 | 38.99 |
| 20 | 22.33* | 0.29 | 1.28 | 20.18* | 1.23 | 6.09 | 36.17 |
| 25 | 19.87  | 0.51 | 2.56 | 18.98  | 0.34 | 1.78 | 36.01 |
| 30 | 20.64* | 0.61 | 2.95 | 17.72* | 0.32 | 1.82 | 36.13 |

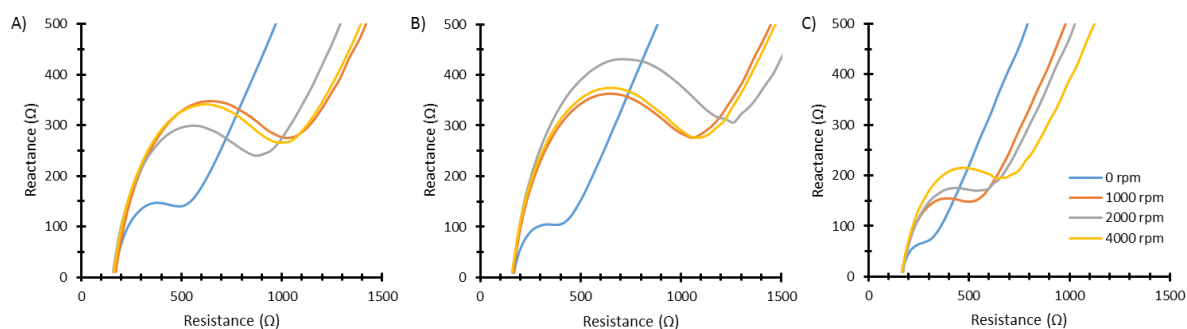

**Figure S4 Effect of rotation speed on Nyquist plots.**

Nyquist plots for a 2mm Au-RDE in 2.5mM ferrocyanide/2.5mM ferricyanide/1X PBS after rotation assisted adsorption at varying rotation speeds for 5 minutes in A) 50nM methylated DNA, B) 50nM unmethylated DNA, and C) 1X PBS. Mean shown (n=3, 1X PBS n=1).

**Table S4 Effect of rotation speed on  $R_{ct}$ .**

$R_{ct}$  (determined from Z-fit analysis of Nyquist plots) for 2mm Au-RDE in 2.5mM ferrocyanide/2.5mM ferricyanide/1X PBS after rotation assisted adsorption at varying rotation speeds for 5 minutes in 50nM methylated DNA, 50nM unmethylated DNA, and 1X PBS. Mean  $\pm$ SD (n=3, PBS n=1). \*Statistical difference between values for methylated and unmethylated DNA, when tested for using a one-way ANOVA ( $p < 0.05$ ).

| Rotation<br>Speed (rpm) | R <sub>ct</sub> (Ω) |       |         |              |       |         | PBS    |
|-------------------------|---------------------|-------|---------|--------------|-------|---------|--------|
|                         | Methylated          |       |         | Unmethylated |       |         |        |
|                         | Mean                | SD    | RSD (%) | Mean         | SD    | RSD (%) |        |
| 0                       | 326.83              | 4.87  | 1.49    | 231.87       | 14.95 | 6.45    | 140.60 |
| 1000                    | 817.67              | 24.93 | 3.05    | 846.87       | 43.67 | 5.16    | 345.00 |
| 2000                    | 684.00*             | 53.21 | 7.78    | 1005.43*     | 32.35 | 3.22    | 396.90 |
| 4000                    | 792.37              | 6.29  | 0.79    | 868.93       | 49.16 | 5.66    | 502.60 |

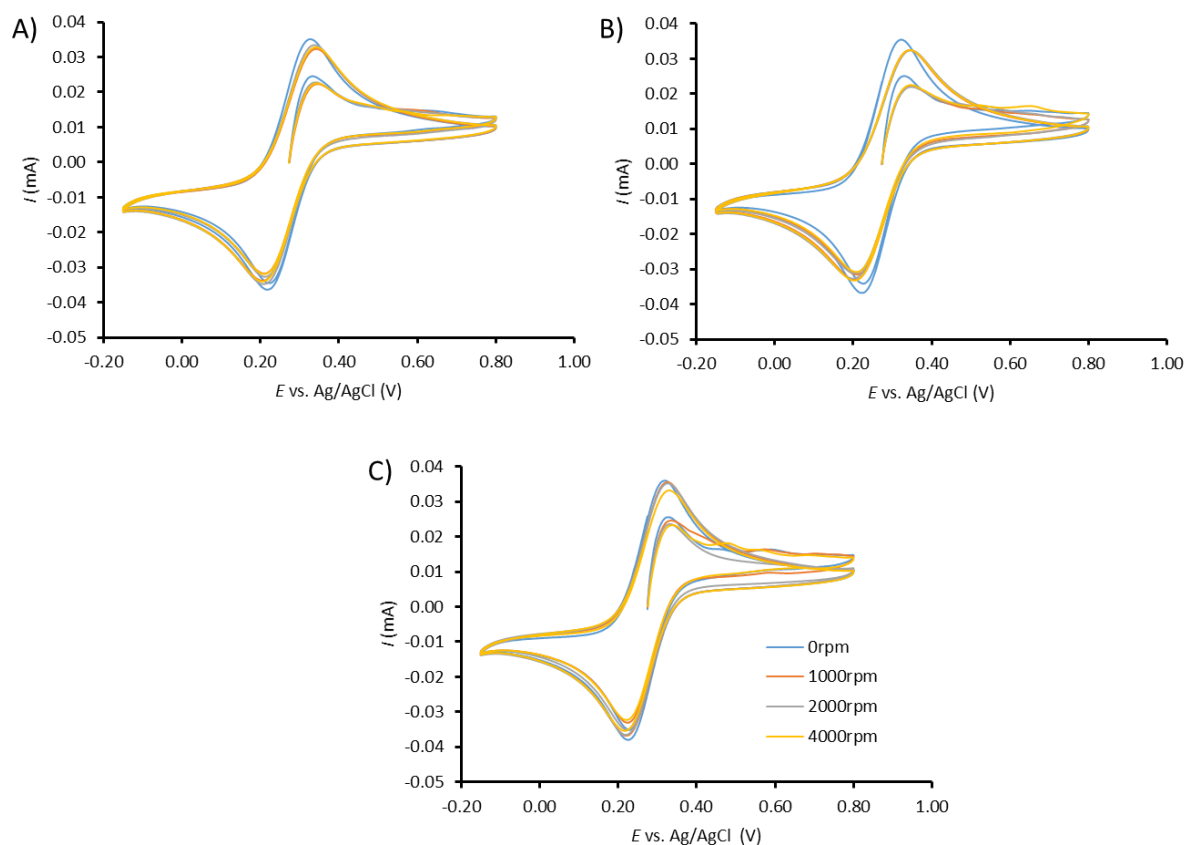

**Figure S5 Effect of rotation speed on Cyclic voltammograms.**

CV conducted with 2mm Au-RDE in 2.5mM ferrocyanide/2.5mM ferricyanide/1X PBS after rotation assisted adsorption at varying rotation speeds for 5 minutes in A) 50nM methylated DNA, B) 50nM unmethylated DNA and C) 1X PBS, at a scan speed of 200mV/s. Mean  $\pm$ SD (n=3, PBS n=1).

**Table S5 Effect of rotation speed on peak to peak separation.**

$\Delta E_p$  (mV) for CV conducted with 2mm Au-RDE in 2.5mM ferrocyanide/2.5mM ferricyanide/1X PBS after rotation assisted adsorption at varying rotation speeds for 5 minutes in 50nM methylated DNA, 50nM unmethylated DNA and 1X PBS, at a scan speed of 200mV/s. Mean  $\pm$ SD (n=3, PBS n=1).

\*Statistical difference between values for methylated and unmethylated DNA, when tested for using a one-way ANOVA ( $p < 0.05$ ).

| Rotation<br>Speed (rpm) | $\Delta E_p$ (mV) |              |     |
|-------------------------|-------------------|--------------|-----|
|                         | Methylated        | Unmethylated | PBS |

|      | mean   | SD  | RSD (%) | mean   | SD  | RSD (%) |       |
|------|--------|-----|---------|--------|-----|---------|-------|
| 0    | 110.3  | 0.1 | 0.06    | 98.7   | 3.0 | 3.03    | 92.4  |
| 1000 | 138.5  | 1.7 | 1.26    | 139.7  | 3.3 | 2.33    | 102.7 |
| 2000 | 129.3* | 5.4 | 4.17    | 147.4* | 0.6 | 0.41    | 108.4 |
| 4000 | 137.0  | 2.0 | 1.46    | 143.7  | 1.8 | 1.28    | 112.6 |

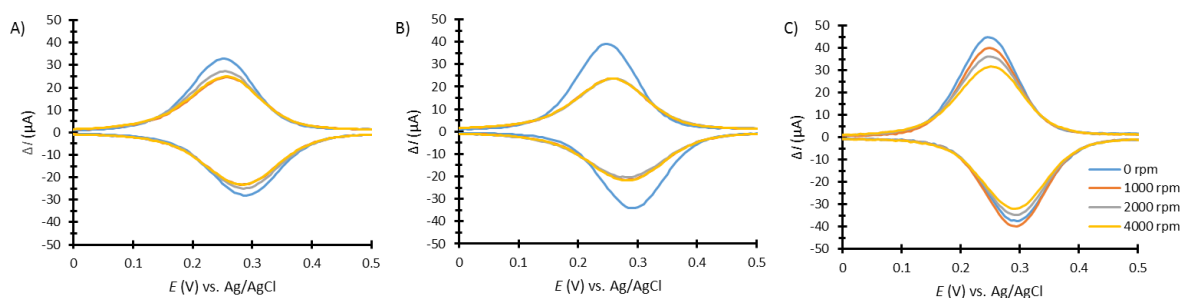

**Figure S6 Effect of rotation speed on DPV.**

DPV signals for 2mm Au-RDE in 2.5mM ferrocyanide/2.5mM ferricyanide/1X PBS after rotation assisted adsorption at varying rotation speeds for 5 minutes in A) 50nM methylated DNA, B) 50nM unmethylated DNA and C) 1X PBS. Mean (n=3, PBS n=1).

**Table S6 Effect of rotation speed on peak current.**

$i_{pa}$  ( $\mu$ A) obtained with 2mm Au-RDE in 2.5mM ferrocyanide/2.5mM ferricyanide/1X PBS after rotation assisted adsorption at varying rotation speeds for 5 minutes in 50nM methylated DNA, 50nM unmethylated DNA and 1X PBS. Mean (n=3, PBS n=1). \*Statistical difference between values for methylated and unmethylated DNA, when tested for using a one-way ANOVA ( $p < 0.05$ ).

| Rotation<br>Speed (rpm) | $i_{pa}$ (μA) |      |         |              |      |         | PBS   |
|-------------------------|---------------|------|---------|--------------|------|---------|-------|
|                         | Methylated    |      |         | Unmethylated |      |         |       |
|                         | Mean          | SD   | RSD (%) | Mean         | SD   | RSD (%) |       |
| 0                       | 32.88         | 0.33 | 1.01    | 39.20        | 0.57 | 1.47    | 44.72 |
| 1000                    | 24.58         | 1.19 | 4.83    | 23.64        | 0.32 | 1.37    | 39.93 |
| 2000                    | 27.32*        | 0.75 | 2.73    | 23.50*       | 0.65 | 2.77    | 36.19 |
| 4000                    | 25.00         | 0.25 | 1.02    | 23.66        | 1.03 | 4.33    | 31.75 |

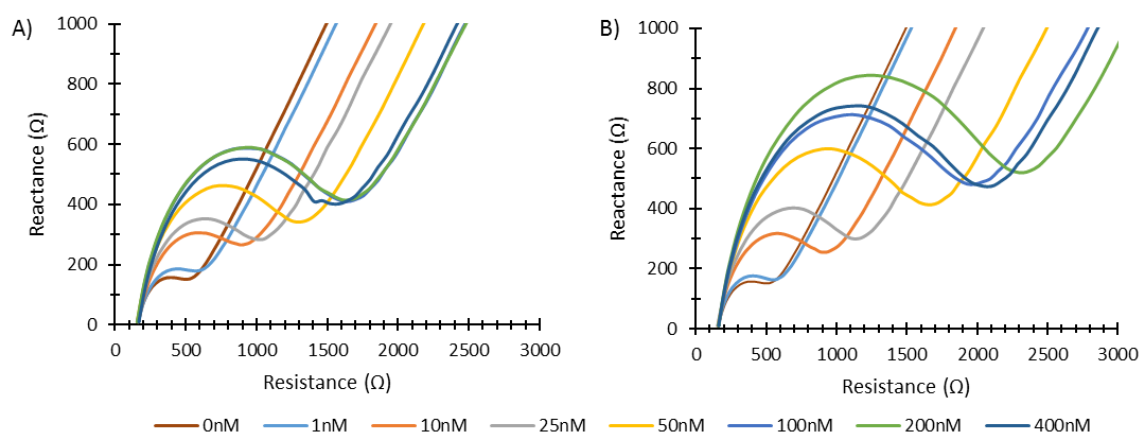

**Figure S7 Effect of DNA concentration on impedance.**

Nyquist plots for a 2mm Au-RDE in 2.5mM ferrocyanide/2.5mM ferricyanide/1X PBS after rotation assisted adsorption at 2000rpm for 5 minutes in varying concentrations of A) methylated DNA, and B) unmethylated DNA. Mean  $\pm$ SD (n=3).

**Table S7 Effect of DNA concentration on  $R_{ct}$ .**

$R_{ct}$  (determined from Z-fit analysis of Nyquist plots) for a 2mm Au-RDE in 2.5mM ferrocyanide/2.5mM ferricyanide/1X PBS after rotation assisted adsorption at 2000rpm for 5 minutes in varying concentrations of methylated and unmethylated DNA. Mean  $\pm$ SD (n=3).

\*Statistical difference between values for methylated and unmethylated DNA, when tested for using a one-way ANOVA ( $p < 0.05$ ), <sup>†</sup>statistical difference to value for baseline 1X PBS ( $p < 0.05$ ).

| Concentration<br>(nM) | $R_{ct}$ ( $\Omega$ ) |       |         |                       |       |         |                       |       |         |
|-----------------------|-----------------------|-------|---------|-----------------------|-------|---------|-----------------------|-------|---------|
|                       | PBS                   |       |         | Methylated            |       |         | Unmethylated          |       |         |
|                       | Mean                  | SD    | RSD (%) | Mean                  | SD    | RSD (%) | Mean                  | SD    | RSD (%) |
| 0                     | 346.27                | 31.34 | 9.05    |                       |       |         |                       |       |         |
| 1                     |                       |       |         | 419.73                | 16.60 | 3.95    | 388.80                | 9.09  | 2.34    |
| 10                    |                       |       |         | 710.73 <sup>†</sup>   | 15.10 | 2.12    | 722.00 <sup>†</sup>   | 21.20 | 2.94    |
| 25                    |                       |       |         | 813.97 <sup>*†</sup>  | 31.11 | 3.82    | 926.17 <sup>*†</sup>  | 15.51 | 1.68    |
| 50                    |                       |       |         | 1078.33 <sup>*†</sup> | 35.02 | 3.25    | 1403.67 <sup>*†</sup> | 38.07 | 2.71    |
| 100                   |                       |       |         | 1385.00 <sup>*†</sup> | 52.42 | 3.78    | 1696.67 <sup>*†</sup> | 35.00 | 2.06    |
| 200                   |                       |       |         | 1387.00 <sup>*†</sup> | 60.23 | 4.34    | 1999.67 <sup>*†</sup> | 20.53 | 1.03    |
| 400                   |                       |       |         | 1309.67 <sup>*†</sup> | 16.65 | 1.27    | 1770.67 <sup>*†</sup> | 17.95 | 1.01    |

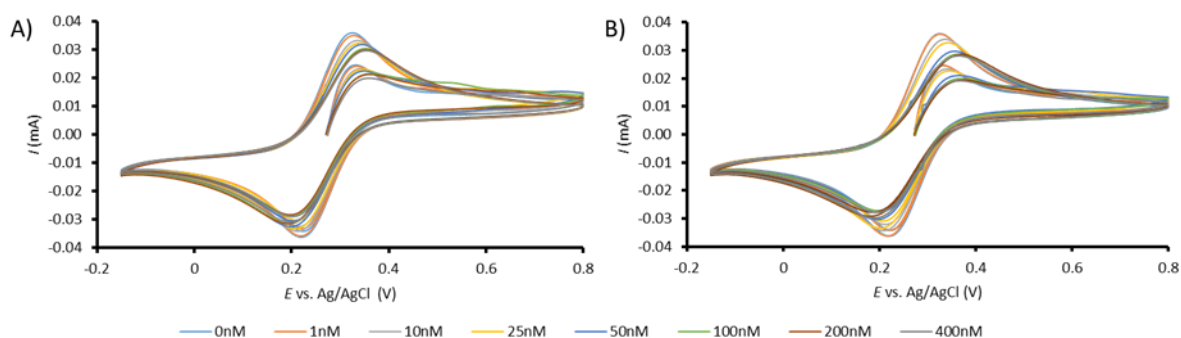

**Figure S8 Effect of DNA concentration on cyclic voltammograms.**

Cyclic voltammograms for a 2mm Au-RDE in 2.5mM ferrocyanide/2.5mM ferricyanide/1X PBS after rotation assisted adsorption at 2000rpm for 5 minutes in varying concentrations of A) methylated and B) unmethylated DNA, at a scan speed of 200mV/s. Mean  $\pm$ SD (n=3).

**Table S8 Effect of DNA concentration on peak to peak separation.**

$\Delta E_p$  (mV) for CV conducted with a 2mm Au-RDE in 2.5mM ferrocyanide/2.5mM ferricyanide/1X PBS after rotation assisted adsorption at 2000rpm for 5 minutes in varying concentrations of methylated and unmethylated DNA, at a scan speed of 200mV/s. Mean  $\pm$ SD (n=3). \*Statistical difference between values for methylated and unmethylated DNA, when tested for using a one-way ANOVA

| Concentration<br>(nM) | $\Delta E_p$ (mV) |     |         |                     |     |         |                     |     |         |
|-----------------------|-------------------|-----|---------|---------------------|-----|---------|---------------------|-----|---------|
|                       | PBS               |     |         | Methylated          |     |         | Unmethylated        |     |         |
|                       | Mean              | SD  | RSD (%) | Mean                | SD  | RSD (%) | Mean                | SD  | RSD (%) |
| 0                     | 105.8             | 2.0 | 1.91    |                     |     |         |                     |     |         |
| 1                     |                   |     |         | 111.1               | 0.8 | 0.73    | 109.7               | 1.7 | 1.60    |
| 10                    |                   |     |         | 121.1 <sup>†</sup>  | 2.6 | 2.12    | 126.4 <sup>†</sup>  | 1.4 | 1.07    |
| 25                    |                   |     |         | 130.0 <sup>*†</sup> | 1.7 | 1.32    | 140.9 <sup>*†</sup> | 3.3 | 2.33    |
| 50                    |                   |     |         | 146.3 <sup>*†</sup> | 2.4 | 1.67    | 162.8 <sup>*†</sup> | 5.6 | 3.44    |
| 100                   |                   |     |         | 155.4 <sup>*†</sup> | 2.0 | 1.27    | 173.3 <sup>*†</sup> | 0.7 | 0.38    |
| 200                   |                   |     |         | 161.2 <sup>*†</sup> | 2.0 | 1.21    | 192.6 <sup>*†</sup> | 1.1 | 0.55    |
| 400                   |                   |     |         | 155.7 <sup>*†</sup> | 0.3 | 0.18    | 183.3 <sup>*†</sup> | 1.3 | 0.70    |

( $p < 0.05$ ), <sup>†</sup>statistical difference to value for baseline 1X PBS ( $p < 0.05$ ).



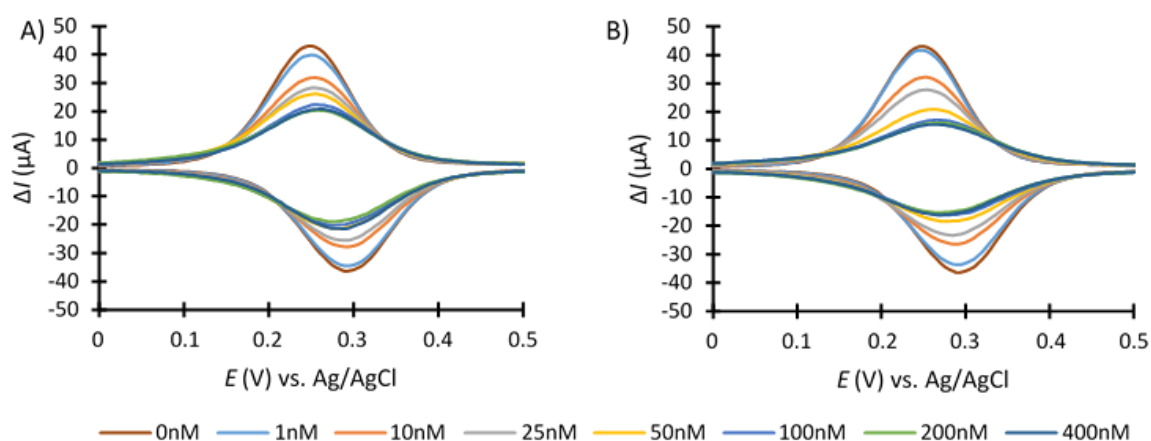

**Figure S9 Effect of DNA concentration on DPV.**

DPV signals for a 2mm Au-RDE in 2.5mM ferrocyanide/2.5mM ferricyanide/1X PBS after rotation assisted adsorption at 2000rpm for 5 minutes in varying concentrations of A) methylated DNA and B) unmethylated DNA. Mean  $\pm$ SD (n=3).

**Table S9 Effect of DNA concentration on peak anodic current.**

$i_{pa}$  ( $\mu$ A) obtained with a 2mm Au-RDE in 2.5mM ferrocyanide/2.5mM ferricyanide/1X PBS after rotation assisted adsorption at 2000rpm for 5 minutes in varying concentrations of methylated and unmethylated DNA. Mean  $\pm$ SD (n=3). \*Statistical difference between values for methylated and unmethylated DNA, when tested for using a one-way ANOVA ( $p < 0.05$ ),  $^{\dagger}$  statistical difference to value for baseline 1X PBS ( $p < 0.05$ ).

| Concentration<br>(nM) | $i_{pa}$ ( $\mu$ A) |      |         |                      |      |         |                      |      |         |
|-----------------------|---------------------|------|---------|----------------------|------|---------|----------------------|------|---------|
|                       | PBS                 |      |         | Methylated           |      |         | Unmethylated         |      |         |
|                       | mean                | SD   | RSD (%) | mean                 | SD   | RSD (%) | mean                 | SD   | RSD (%) |
| 0                     | 43.09               | 1.37 | 3.17    |                      |      |         |                      |      |         |
| 1                     |                     |      |         | 39.93 $^{\dagger}$   | 0.56 | 1.39    | 41.74                | 0.53 | 1.28    |
| 10                    |                     |      |         | 31.93 $^{\dagger}$   | 0.56 | 1.76    | 32.23 $^{\dagger}$   | 0.39 | 1.21    |
| 25                    |                     |      |         | 28.32 $^{\dagger}$   | 0.34 | 1.20    | 27.85 $^{\dagger}$   | 0.78 | 2.81    |
| 50                    |                     |      |         | 26.23 $^{* \dagger}$ | 0.35 | 1.35    | 20.94 $^{* \dagger}$ | 0.63 | 3.01    |
| 100                   |                     |      |         | 22.43 $^{* \dagger}$ | 0.28 | 1.26    | 17.23 $^{* \dagger}$ | 0.11 | 0.65    |
| 200                   |                     |      |         | 19.92 $^{* \dagger}$ | 0.17 | 0.84    | 16.17 $^{* \dagger}$ | 0.83 | 5.13    |
| 400                   |                     |      |         | 20.86 $^{* \dagger}$ | 0.16 | 0.78    | 15.63 $^{* \dagger}$ | 0.14 | 0.89    |

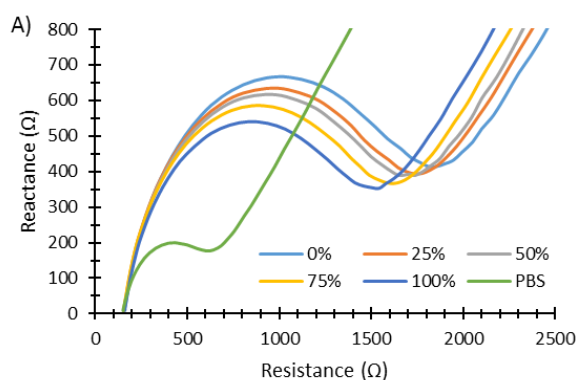

**Figure Error! No text of specified style in document..10 Effect of % methylation on impedance.** Nyquist plots for a 2mm Au-RDE in 2.5mM ferrocyanide/2.5mM ferricyanide/1X PBS after rotation assisted adsorption at 2000rpm for 5 minutes in varying % methylation solutions (200nM), and 1X PBS (mean, n=3). Mean  $\pm$ SD (n=3). 1X PBS  $R_{ct}$  454.17  $\pm$ 37.08  $\Omega$ .

**Table S10 Effect of % methylation on  $R_{ct}$ .**

$R_{ct}$  (determined from Z-fit analysis of Nyquist plots) for a 2mm Au-RDE in 2.5mM ferrocyanide/2.5mM ferricyanide/1X PBS after rotation assisted adsorption at 2000rpm for 5 minutes in varying % methylation solutions (200nM) and 1X PBS. Mean  $\pm$ SD (n=3).

| % methylation | $R_{ct}$ ( $\Omega$ ) |       |         |
|---------------|-----------------------|-------|---------|
|               | Mean                  | SD    | RSD (%) |
| PBS           | 454.17                | 37.08 | 8.16    |
| 0             | 1560.67               | 25.15 | 1.61    |
| 25            | 1473.67               | 6.66  | 0.45    |
| 50            | 1426.67               | 21.59 | 1.51    |
| 75            | 1351.33               | 27.32 | 2.02    |
| 100           | 1251.33               | 12.01 | 0.96    |

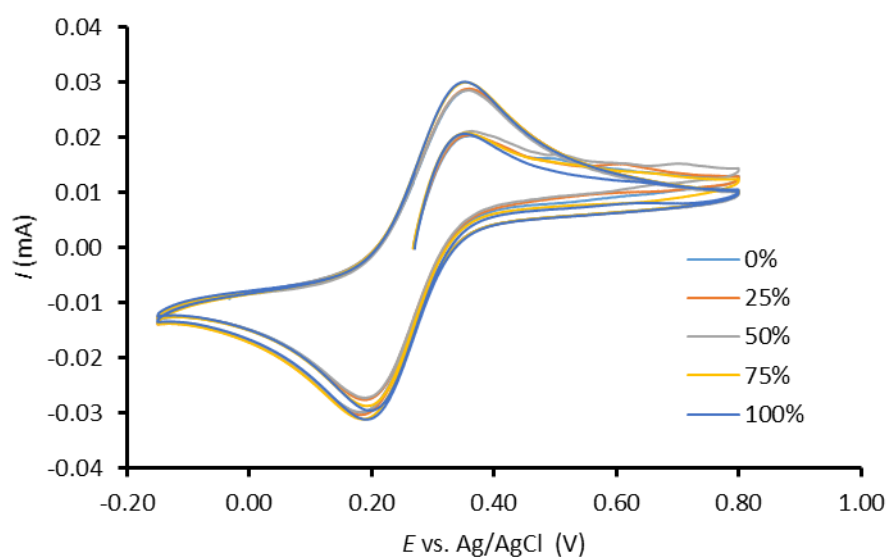

**Figure S11 Effect of % methylation on cyclic voltammogram.**

CV conducted with a 2mm Au-RDE in 2.5mM ferrocyanide/2.5mM ferricyanide/1X PBS after rotation assisted adsorption at 2000rpm for 5 minutes in varying % methylation solutions (200nM), at a scan speed of 200mV/s. Mean  $\pm$ SD (n=3).

**Table S11 Effect of % methylation on peak to peak separation.**

$\Delta E_p$  (mV) for CV conducted with a 2mm Au-RDE in 2.5mM ferrocyanide/2.5mM ferricyanide/1X PBS after rotation assisted adsorption at 2000rpm for 5 minutes in varying % methylation solutions (200nM) and 1X PBS, at a scan speed of 200mV/s. Mean  $\pm$ SD (n=3).

| % Methylation | $\Delta E_p$ (mV) |     |         |
|---------------|-------------------|-----|---------|
|               | Mean              | SD  | RSD (%) |
| PBS           | 115.3             | 8.0 | 6.93    |
| 0             | 178.5             | 1.2 | 0.70    |
| 25            | 177.8             | 6.6 | 3.70    |
| 50            | 177.7             | 6.7 | 3.79    |
| 75            | 169.0             | 0.5 | 0.27    |
| 100           | 159.9             | 1.7 | 1.07    |

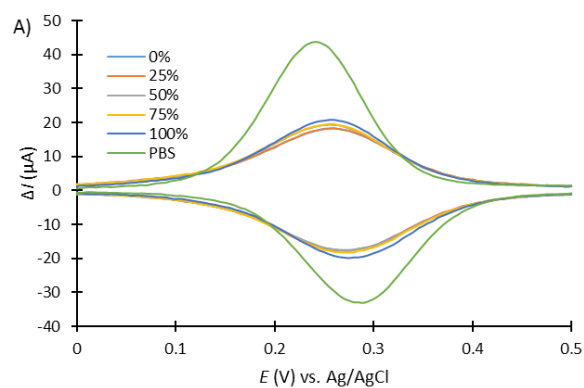

**Figure S12 Effect of % methylation on DPV.**

DPV signals for 2mm Au-RDE in 2.5mM ferrocyanide/2.5mM ferricyanide/1X PBS after rotation assisted adsorption at 2000rpm for 5 minutes in varying % methylation solutions (200nM) and 1X PBS. Mean  $\pm$ SD (n=3). PBS  $i_{pa}$  43.72 $\pm$ 2.82 $\mu$ A.

**Table S12 Effect of % methylation on peak anodic current.**

$i_{pa}$  ( $\mu$ A) for 2mm Au-RDE in 2.5mM ferrocyanide/2.5mM ferricyanide/1X PBS after rotation assisted adsorption at 2000rpm for 5 minutes in varying % methylation solutions (200nM). Mean  $\pm$ SD (n=3).

| % Methylation | $i_{pa}$ ( $\mu$ A) |      |         |
|---------------|---------------------|------|---------|
|               | Mean                | SD   | RSD (%) |
| PBS           | 43.72               | 2.82 | 6.44    |
| 0             | 18.34               | 0.58 | 3.16    |
| 25            | 18.38               | 0.11 | 0.61    |
| 50            | 19.38               | 0.12 | 0.61    |
| 75            | 19.63               | 0.27 | 0.61    |
| 100           | 20.89               | 0.30 | 1.42    |

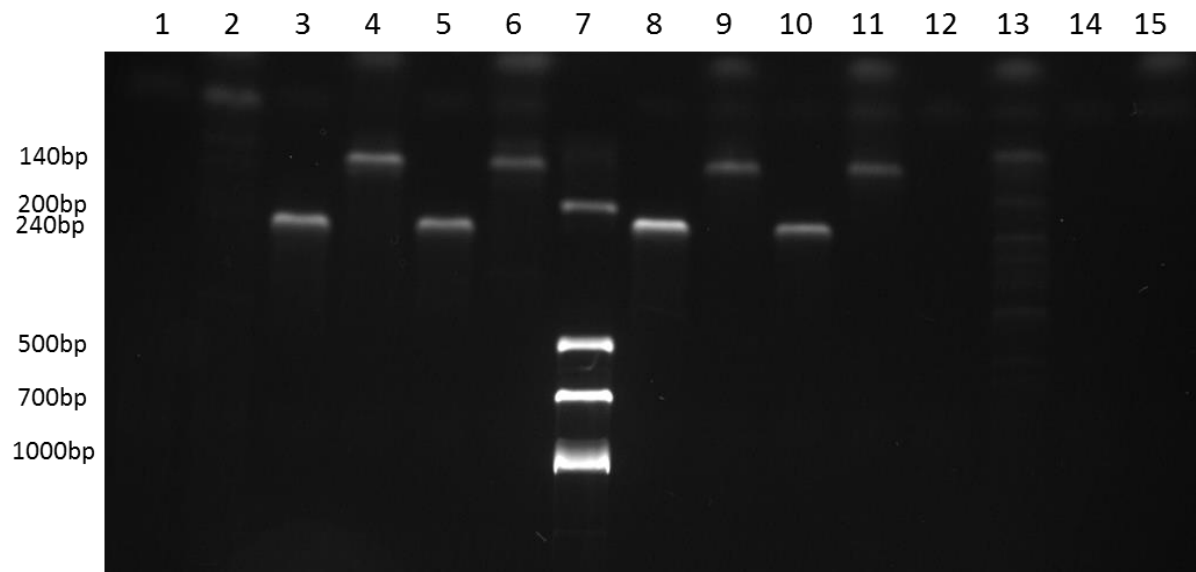

**Figure S13 Gel electrophoresis analysis.**

Electrophoresis run at 100V for 90 minutes on 2% agarose. Each lane contains: WGA DNA with 1) bisulphite kit primers 2) Koo et al. (2014) primers; bisulphite modified WGA DNA with 3) bisulphite kit primers, 4) Koo et al. (2014) primers; bisulphite modified MCF-7 DNA with 5) bisulphite kit primers, 6) Koo et al. (2014) primers; 7) ladder, standard bands 1000, 700, 500 and 200bp; bisulphite modified control sample with 8) bisulphite kit primers, 9) Koo et al. (2014) primers; pre-treated positive control with 10) bisulphite kit primers, 11) Koo et al. (2014) primers; untreated negative control sample with 12) bisulphite kit primers, 13) Koo et al. (2014) primers; DNA negative sample with 14) bisulphite kit primers, 15) Koo et al. (2014) primers.

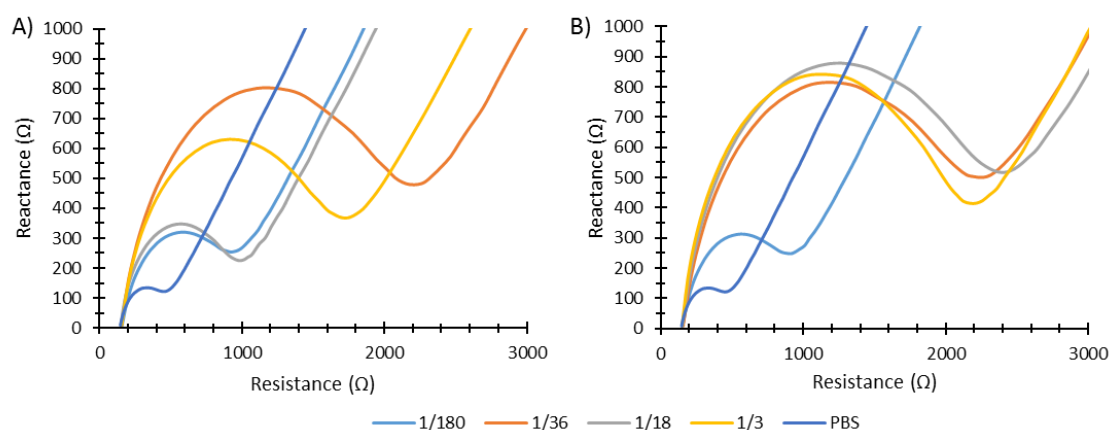

**Figure S14 Effect fractional proportion of secondary PCR product in test solution on impedance.** Nyquist plots for a 2mm Au-RDE in 2.5mM ferrocyanide/2.5mM ferricyanide/1X PBS after rotation assisted adsorption at 2000rpm for 5 minutes in varying dilutions of amplicons of the EN1 gene promoter from A) MCF-7 DNA and B) WGA DNA. Mean  $\pm$ SD (n=3).

**Table S13 Effect of fractional proportion of secondary PCR product in test solution on  $R_{ct}$ .**  $R_{ct}$  (determined from Z-fit analysis of Nyquist plots) for a 2mm Au-RDE in 2.5mM ferrocyanide/2.5mM ferricyanide/1X PBS after rotation assisted adsorption at 2000rpm for 5 minutes in varying dilutions of amplicons of the EN1 gene promoter from MCF-7 and WGA DNA against 1X PBS. Mean  $\pm$ SD (n=3). \* Statistical difference between values for EN1 amplicons from MCF-7 and WGA DNA, when tested for using a one-way ANOVA ( $p < 0.05$ ), <sup>†</sup> statistical difference to value

| Fraction | $R_{ct}$ ( $\Omega$ ) |       |         |                       |       |         |                       |       |         |
|----------|-----------------------|-------|---------|-----------------------|-------|---------|-----------------------|-------|---------|
|          | PBS                   |       |         | MCF-7 DNA             |       |         | WGA DNA               |       |         |
|          | Mean                  | SD    | RSD (%) | Mean                  | SD    | RSD (%) | Mean                  | SD    | RSD (%) |
| 0        | 296.27                | 10.30 | 3.48    |                       |       |         |                       |       |         |
| 1/180    |                       |       |         | 724.63 <sup>†</sup>   | 9.58  | 1.32    | 698.03 <sup>†</sup>   | 22.67 | 3.25    |
| 1/36     |                       |       |         | 1901.33 <sup>†</sup>  | 83.07 | 4.37    | 1931.67 <sup>†</sup>  | 75.08 | 3.89    |
| 1/18     |                       |       |         | 765.17 <sup>*†</sup>  | 15.01 | 1.96    | 2073.67 <sup>*†</sup> | 28.54 | 1.38    |
| 1/3      |                       |       |         | 1444.67 <sup>*†</sup> | 23.18 | 1.60    | 1871.33 <sup>*†</sup> | 77.36 | 4.13    |

for baseline 1X PBS ( $p < 0.05$ ).

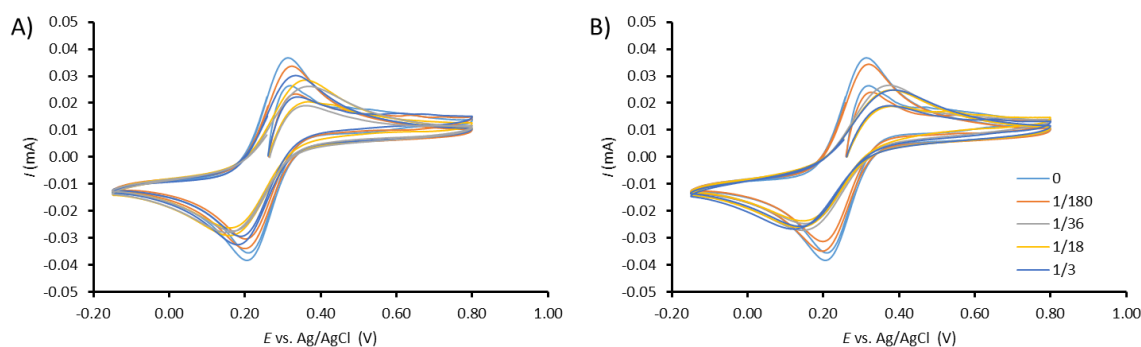

**Figure S15 Effect of fractional proportion of secondary PCR product in test solution on cyclic voltammograms.**

CV conducted with a 2mm Au-RDE in 2.5mM ferrocyanide/2.5mM ferricyanide/1X PBS after rotation assisted adsorption at 2000rpm for 5 minutes in varying dilutions of amplicons of the EN1 gene promoter from A) MCF-7 and B) WGA DNA, against 1X PBS at a scan speed of 200mV/s. Mean  $\pm$ SD (n=3).

**Table S14 Effect of fractional proportion of secondary PCR product in test solution on peak to peak separation.**

$\Delta E_p$  (mV) for CV conducted with a 2mm Au-RDE in 2.5mM ferrocyanide/2.5mM ferricyanide/1X PBS after rotation assisted adsorption at 2000rpm for 5 minutes in varying dilutions of amplicons of the EN1 gene promoter from MCF-7 and WGA DNA, against 1X PBS at a scan speed of 200mV/s. Mean  $\pm$ SD (n=3). \*Statistical difference between values for EN1 amplicons from MCF-7 and WGA DNA, when tested for using a one-way ANOVA ( $p < 0.05$ ), <sup>†</sup>statistical difference to value for baseline 1X PBS

| Fraction | $\Delta E_p$ (mV) |     |         |                     |     |         |                     |      |         |
|----------|-------------------|-----|---------|---------------------|-----|---------|---------------------|------|---------|
|          | PBS               |     |         | MCF-7 DNA           |     |         | WGA DNA             |      |         |
|          | Mean              | SD  | RSD (%) | Mean                | SD  | RSD (%) | Mean                | SD   | RSD (%) |
| 0        | 108.5             | 2.5 | 2.32    |                     |     |         |                     |      |         |
| 1/180    |                   |     |         | 124.3               | 3.4 | 2.71    | 123.6               | 0.3  | 0.28    |
| 1/36     |                   |     |         | 200.3 <sup>*†</sup> | 8.9 | 4.46    | 227.6 <sup>*†</sup> | 12.6 | 5.55    |
| 1/18     |                   |     |         | 152.7 <sup>*†</sup> | 2.8 | 1.80    | 243.7 <sup>*†</sup> | 8.4  | 3.46    |
| 1/3      |                   |     |         | 213.7 <sup>*†</sup> | 5.1 | 2.40    | 264.9 <sup>*†</sup> | 5.7  | 2.15    |

( $p < 0.05$ ).

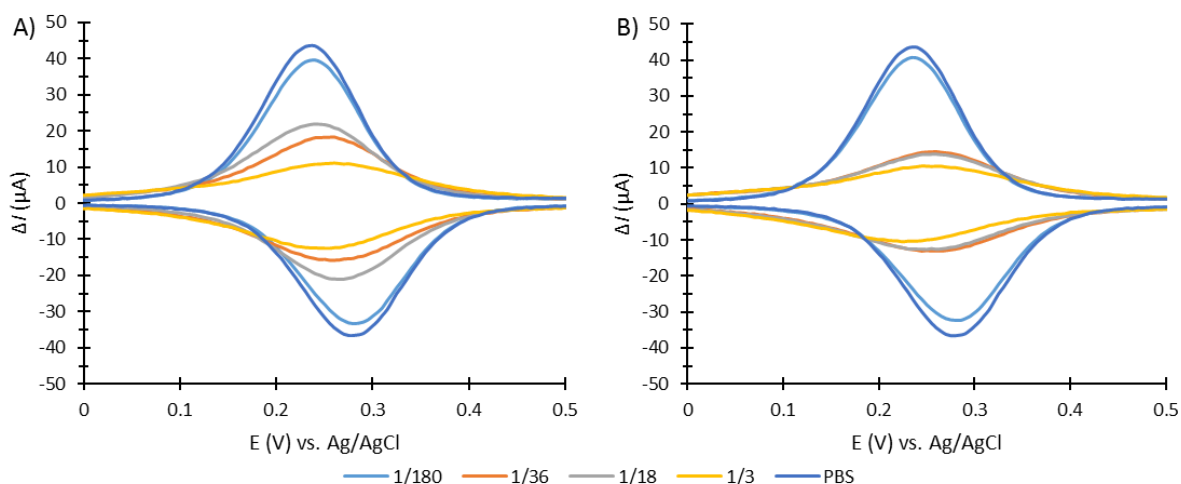

**Figure S16 Effect of fractional proportion of secondary PCR product in test solution on DPV.**

DPV signals for a 2mm Au-RDE in 2.5mM ferrocyanide/2.5mM ferricyanide/1X PBS after rotation assisted adsorption at 2000rpm for 5 minutes in varying dilutions of amplicons of the EN1 gene promoter from A) MCF-7 DNA and B) WGA DNA. Mean  $\pm$ SD (n=3).

**Table S15 Effect of fractional proportion of secondary PCR product in test solution on peak current.**

$i_{pa}$  obtained with 2mm Au-RDE in 2.5mM ferrocyanide/2.5mM ferricyanide/1X PBS after rotation assisted adsorption at 2000rpm for 5 minutes in varying dilutions of amplicons of the EN1 gene promoter from MCF-7 and WGA DNA against 1X PBS. Mean  $\pm$ SD (n=3). \*Statistical difference between values for EN1 amplicons from MCF-7 and WGA DNA, when tested for using a one-way ANOVA ( $p < 0.05$ ), <sup>†</sup>statistical difference to value for baseline 1X PBS ( $p < 0.05$ ).

| Fraction | $i_{pa}$ ( $\mu$ A) |      |         |                     |      |         |                     |      |         |
|----------|---------------------|------|---------|---------------------|------|---------|---------------------|------|---------|
|          | PBS                 |      |         | MCF-7 DNA           |      |         | WGA DNA             |      |         |
|          | mean                | SD   | RSD (%) | mean                | SD   | RSD (%) | mean                | SD   | RSD (%) |
| 0        | 43.61               | 0.25 | 0.58    |                     |      |         |                     |      |         |
| 1/180    |                     |      |         | 39.61 <sup>†</sup>  | 1.05 | 2.65    | 40.73 <sup>†</sup>  | 1.08 | 2.65    |
| 1/36     |                     |      |         | 18.47 <sup>*†</sup> | 2.17 | 11.77   | 14.66 <sup>*†</sup> | 1.11 | 7.55    |
| 1/18     |                     |      |         | 21.94 <sup>*†</sup> | 0.53 | 2.42    | 13.90 <sup>*†</sup> | 0.18 | 1.32    |
| 1/3      |                     |      |         | 11.16 <sup>†</sup>  | 0.53 | 4.74    | 10.44 <sup>†</sup>  | 0.81 | 7.78    |



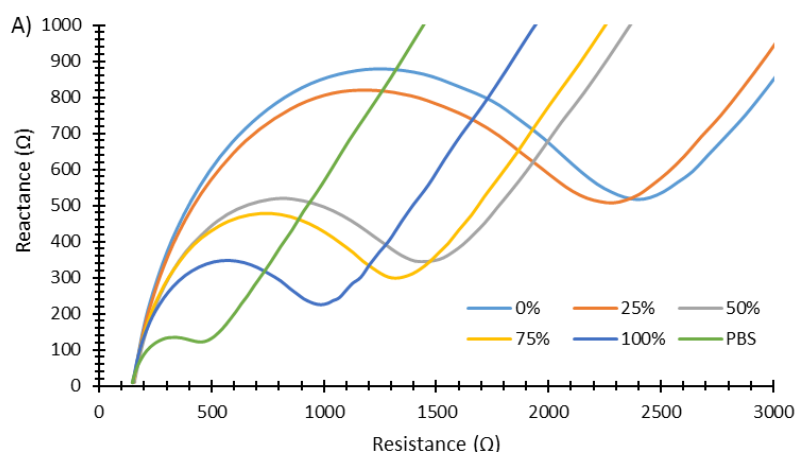

**Figure S17 Effect of MCF-7/WGA percentage in test solution on impedance.**

Nyquist plot for a 2mm Au-RDE in 2.5mM ferrocyanide/2.5mM ferricyanide/1X PBS after rotation assisted adsorption at 2000rpm for 5 minutes in varying % methylation solutions (mean, n=3). Methylated and unmethylated DNA derived from amplicons of the EN1 gene promoter from MCF-7 and WGA DNA respectively. Secondary PCR product of amplicons total 1/18 in solution. Mean  $\pm$ SD (n=3).

**Table S16 Effect of MCF-7/WGA percentage in test solution on  $R_{ct}$ .**

$R_{ct}$  (determined from Z-fit analysis of Nyquist plots) for a 2mm Au-RDE in 2.5mM ferrocyanide/2.5mM ferricyanide/1X PBS after rotation assisted adsorption at 2000rpm for 5 minutes in varying % methylation solutions. Methylated and unmethylated DNA derived from amplicons of the EN1 gene promoter from MCF-7 and WGA DNA respectively. Secondary PCR product of amplicons total 1/18 in solution. Mean  $\pm$ SD (n=3).

| % methylation | $R_{ct}$ ( $\Omega$ ) |       |         |
|---------------|-----------------------|-------|---------|
|               | Mean                  | SD    | RSD (%) |
| PBS           | 296.27                | 10.30 | 3.48    |
| 0             | 2073.67               | 28.54 | 1.38    |
| 25            | 1962.00               | 31.43 | 1.60    |
| 50            | 1203.67               | 1.53  | 0.13    |
| 75            | 1083.00               | 7.55  | 0.70    |
| 100           | 765.17                | 15.01 | 1.96    |

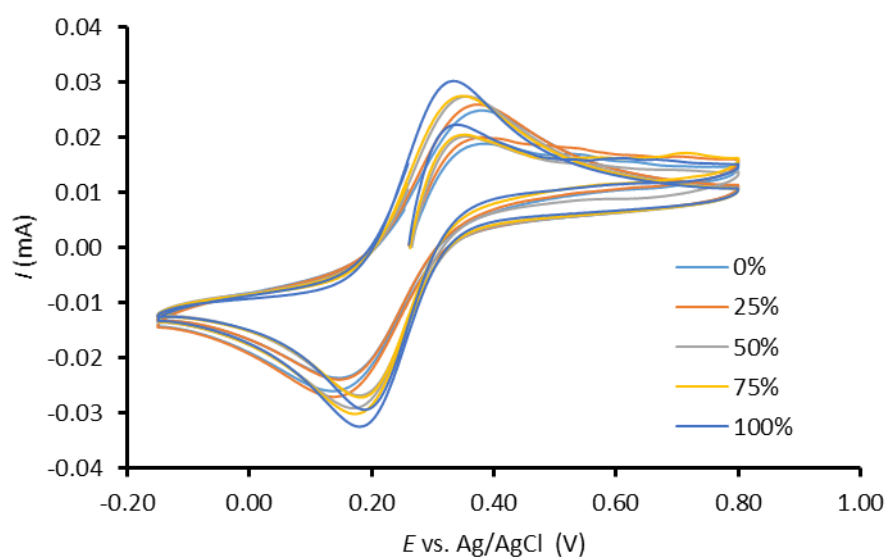

**Figure S18 Effect of MCF-7/WGA percentage in test solution on cyclic voltammogram.**

CV conducted with a 2mm Au-RDE in 2.5mM ferrocyanide/2.5mM ferricyanide/1X PBS after rotation assisted adsorption at 2000rpm for 5 minutes in varying % methylation solutions at a scan speed of 200mV/s. Methylated and unmethylated DNA derived from amplicons of the EN1 gene promoter from MCF-7 and WGA DNA respectively. Secondary PCR product of amplicons total 1/18 in solution. Mean  $\pm$ SD (n=3).

**Table S17 Effect of MCF-7/WGA percentage in test solution on peak to peak separation.**

$\Delta E_p$  (mV) for CV conducted with a 2mm Au-RDE in 2.5mM ferrocyanide/2.5mM ferricyanide/1X PBS after rotation assisted adsorption at 2000rpm for 5 minutes in varying % methylation solutions at a scan speed of 200mV/s. Methylated and unmethylated DNA derived from amplicons of the EN1 gene promoter from MCF-7 and WGA DNA respectively. Secondary PCR product of amplicons total 1/18 in solution. Mean  $\pm$ SD (n=3).

| % Methylation | $\Delta E_p$ (mV) |     |         |
|---------------|-------------------|-----|---------|
|               | Mean              | SD  | RSD (%) |
| PBS           | 108.5             | 2.5 | 2.32    |
| 0             | 243.7             | 8.4 | 3.46    |
| 25            | 234.0             | 1.5 | 0.62    |
| 50            | 183.7             | 4.2 | 2.30    |
| 75            | 175.3             | 5.2 | 2.99    |
| 100           | 152.7             | 2.8 | 1.80    |

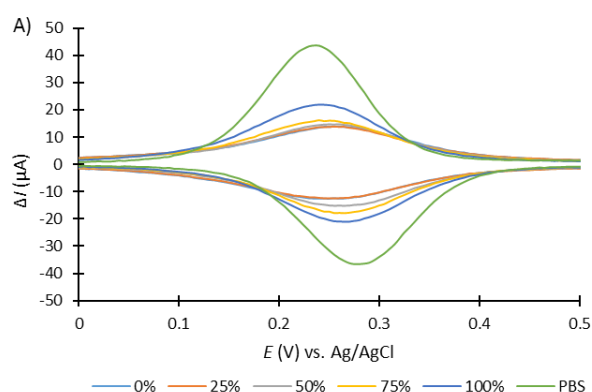

**Figure S19 Effect of MCF-7/WGA percentage in test solution on DPV.**

DPV signals obtained with a 2mm Au-RDE in 2.5mM ferrocyanide/2.5mM ferricyanide/1X PBS after rotation assisted adsorption at 2000rpm for 5 minutes in varying % methylation solutions. Methylated and unmethylated DNA derived from amplicons of the EN1 gene promoter from MCF-7 and WGA DNA respectively. Secondary PCR product of amplicons total 1/18 in solution. Mean  $\pm$ SD (n=3).

**Table S18 Effect of MCF-7/WGA percentage in test solution on peak current.**

$i_{pa}$  ( $\mu$ A) obtained with a 2mm Au-RDE in 2.5mM ferrocyanide/2.5mM ferricyanide/1X PBS after rotation assisted adsorption at 2000rpm for 5 minutes in varying % methylation solutions. Methylated and unmethylated DNA derived from amplicons of the EN1 gene promoter from MCF-7 and WGA DNA respectively. Secondary PCR product of amplicons total 1/18 in solution. Mean  $\pm$ SD (n=3).

| % Methylation | $i_{pa}$ ( $\mu$ A) |      |         |
|---------------|---------------------|------|---------|
|               | Mean                | SD   | RSD (%) |
| PBS           | 43.61               | 0.25 | 0.58    |
| 0             | 13.90               | 0.18 | 1.32    |
| 25            | 13.87               | 0.15 | 1.10    |
| 50            | 14.74               | 0.57 | 3.85    |
| 75            | 16.21               | 0.45 | 2.75    |
| 100           | 21.94               | 0.53 | 2.42    |
